# Supplementary material
Source: PubMed Central journal article supplement (PMC3837791)
Supplement: AEM.02377-13_zam999104963so1.pdf [file AEM.02377-13_zam999104963so1.pdf]

Table S1 Identification of the five genes in 19 lactobacilli strains and sequence conservation similarity

| Group | Strains                               | Genes ID (accession No.) and similarity with the PM1 strain <sup>a</sup> |                                              |                                                              |                                                                                                                                              |                                                                                                          |
|-------|---------------------------------------|--------------------------------------------------------------------------|----------------------------------------------|--------------------------------------------------------------|----------------------------------------------------------------------------------------------------------------------------------------------|----------------------------------------------------------------------------------------------------------|
|       |                                       | Fructokinase                                                             | 6-phosphofructokinase                        | Glucose 6-phosphate isomerase                                | Fructose 1,6-diphosphate aldolase                                                                                                            | Triosephosphate isomerase                                                                                |
| I     | <i>L. acidophilus</i> 30SC            | 650745597 (YP_004286346), 44.97%                                         | 650746564 (YP_004292051)                     | 650746372 (YP_004291861), 69.25%                             | 650747281 (YP_004292767), 71.80%                                                                                                             | 650746322 (YP_004291811), 40.31%                                                                         |
|       | <i>L. amylovorus</i> GRL 1112         | 650724351 (YP_004030817), 8.22%<br>650724347 (YP_004030813), 44.97%      | 650725350 (YP_004031755)                     | 650725157 (YP_004031565), 69.25%                             | 650726109 (YP_004032513), 71.80%                                                                                                             | 650725087 (YP_004031495), 40.31%                                                                         |
|       | <i>L. crispatus</i> ST1               | 646761531 (YP_003600490), 41.95%                                         | 646762585 (YP_003601479)                     | 646762330 (YP_003601227), 68.14%                             | 646763201 (YP_003602094), 70.49%                                                                                                             | 646762284 (YP_003601181), 41.47%                                                                         |
|       | <i>L. delbrueckii bulgaricus</i> 2038 | N.F.                                                                     | 650390714 (ADY84901)<br>650391575 (ADY85687) | 650390580 (ADY84772), 67.55%                                 | 650391374 (ADY85510), 69.18%                                                                                                                 | 650390527 (ADY84719), 40.31%                                                                             |
|       | <i>L. gasseri</i> ATCC 33323          | 639671876 (YP_813869), 44.82%                                            | 639672737 (YP_814708)                        | 639673092 (YP_815060), 67.77%                                | 639672325 (YP_814303), 66.56%                                                                                                                | 639673139 (YP_815107), 42.02%                                                                            |
|       | <i>L. helveticus</i> DPC 4571         | 641310735 (YP_001576600), 37.20%                                         | 641311598 (YP_001577401)                     | 641311408 (YP_001577214), 67.48%                             | 641312090 (YP_001577892), 71.15%                                                                                                             | N.F.                                                                                                     |
|       | <i>L. johnsonii</i> DPC 6026          | 651136969 (AEB92353), 44.15%                                             | 651138043 (AEB93408)                         | 651138189 (AEB93552), 67.77%                                 | 651137472 (AEB92841), 66.23%                                                                                                                 | 651138237 (AEB93600), 42.41%                                                                             |
|       | <i>L. kefiranofaciens</i> ZW3         | 650904929 (YP_004563251), 43.29%                                         | 650904173 (YP_004562509)                     | 650904375 (YP_004562710), 68.14%                             | 650903657 (YP_004561994), 71.80%                                                                                                             | 650904413 (YP_004562748), 39.92%                                                                         |
|       | <i>L. ruminis</i> ATCC 27782          | 2521929235, 46.62%                                                       | 2521929885                                   | 2521930531, 71.02%                                           | 2521930559, 66.32%                                                                                                                           | 2521929706, 39.30%                                                                                       |
|       | <i>L. salivarius</i> CECT 5713        | 648250961 (ADJ79471), 48.31%                                             | 648250462 (ADJ78994)                         | 648250176 (ADJ78713), 70.58%                                 | 648250105 (ADJ78668), 66.21%                                                                                                                 | 648250709 (ADJ79239), 38.91%                                                                             |
| II    | <i>L. casei</i> ATCC334               | N.F.                                                                     | 639664304 (YP_806584)                        | 639664077 (YP_806359), 67.70%                                | 639663308 (YP_805630), 27.52%<br>639663408 (YP_805730), 55.07%<br>639665611 (YP_807862), 29.29%                                              | 639663926 (YP_806209), 39.69%<br>639665610 (YP_807861), 15.44%                                           |
|       | <i>L. plantarum</i> WCFS1             | 637387577 (NP_784016), 20.55%<br>637390475 (NP_786830), 28.82%           | 637389046 (NP_785441)                        | 637389578 (NP_785941), 72.79%                                | 637387703 (NP_784142), 59.31%                                                                                                                | 637388111 (NP_784536), 43.19%                                                                            |
|       | <i>L. rhamnosus</i> GC                | 645012628 (YP_003170153), 41.84%                                         | 645013595 (YP_003171120)                     | 645013306 (YP_003170831), 67.92%                             | 645012414 (YP_003169939), 28.38%<br>645012634 (YP_003170159), 27.72%<br>645012635 (YP_003170160), 30.97%<br>645012745 (YP_003170270), 54.73% | 645013156 (YP_003170681), 40.86%                                                                         |
|       | <i>L. sakei sakei</i> 23K             | 637796403 (YP_396403), 60.80%                                            | 637795615 (YP_395644)                        | 637795762 (YP_395789), 69.45%                                | 637796116 (YP_396141), 59.31%                                                                                                                | 637795189 (YP_395221), 39.69%                                                                            |
| III   | <i>L. brevis</i> ATCC367              | 639654318 (YP_796245), 73.63%                                            | N.F.                                         | 639653487 (YP_795446), 73.67%                                | N.F.                                                                                                                                         | 639652851 (YP_794837), 40.47%                                                                            |
|       | <i>L. buchneri</i> NRRL B-30929       | 2505384060, 75.69%                                                       | N.F.                                         | 2505384064, 75.66%                                           | N.F.                                                                                                                                         | 2520958147, 43.97%                                                                                       |
|       | <i>L. fermentum</i> CECT5716          | 648249646 (ADJ4163), 81.29%                                              | N.F.                                         | 648249647 (ADJ41632), 77.88%<br>648248900 (ADJ40936), 77.66% | N.F.                                                                                                                                         | 648248902 (ADJ40938), 51.94%                                                                             |
|       | <i>L. reuteri</i> JCM 1112            | 642584601 (YP_001841850), 28.23%<br>642584602 (YP_001841851), 29.93%     | N.F.                                         | 640590226 (YP_001271026), 88.27%                             | 640590034 (YP_001270845), 82.64%                                                                                                             | 642583870 (YP_001841158), 62.26%<br>642583938 (YP_001841224), 64.37%<br>642584103 (YP_001841379), 41.63% |
|       | <i>L. sanfranciscensis</i> TMW 1.1304 | 2511696944, 56.42%                                                       | N.F.                                         | 2511696945, 73.07%                                           | N.F.                                                                                                                                         | 2511696895, 40.47%                                                                                       |

<sup>a</sup> Each gene was searched in DOE Joint Genome Institute (<http://www.jgi.doe.gov/>) and similarity with the PM1 strain was analyzed at the UniProt database (<http://www.uniprot.org>). Gene ID is from DOE joint Genome Institute and accession No. is from Genbank  
N.F. not found
